# Supplementary material
Source: publisher site journal article supplement (https://subtbiol.pensoft.net/article/79447/download/suppl/36/)
Supplement: Supplementary file 1

Table S6. Comparison of *Asellus ismailsezarii* sp. nov. with *A. monticola*, *A. kosswigi*, and *Asellus aquaticus* and its known hypogean subspecies from Europe (*A. a. infernus*, *A. a. cavernicolous*). Abbreviations: A II – antenna II, Prp IV, VII – pereopods IV and VII, Plp IV, V – pleopods IV and V. Most discriminative features between *A. ismailsezarii* and any other species analysed here are presented in bold (note value overlapping).

Mohammad Javad Malek-Hosseini, Jure Jugovic, Yaser Fatemi, Matjaž Kuntner, Rok Kostanjšek, Christophe J. Douady, Florian Malard. A new obligate groundwater species of *Asellus* (Isopoda: Asellidae) from Iran. *Subterranean Biology*

|            |                                                  | <i>A. ismailsezarii</i> sp. nov.                                                                                          | <i>A. monticola</i> Birstein, 1932                                                                                              | <i>A. kosswigi</i> Verovnik, Prevorčnik & Jugovic, 2009                                                                      |
|------------|--------------------------------------------------|---------------------------------------------------------------------------------------------------------------------------|---------------------------------------------------------------------------------------------------------------------------------|------------------------------------------------------------------------------------------------------------------------------|
|            | References                                       | this study                                                                                                                | Birstein 1932, Henry & Magniez 1996                                                                                             | Verovnik et al., 2009                                                                                                        |
|            | Habitat                                          | <b>hypogean</b>                                                                                                           | <b>epigean</b>                                                                                                                  | hypogean                                                                                                                     |
| Body, eyes | pigmentation                                     | <b>absent, lack of eyes structures</b>                                                                                    | <b>present: almost evenly pigmented</b> head with some small white patches, eyes black, fully pigmented with 3–4 ommatidia each | absent, lack of eyes structures                                                                                              |
| A II       | Length, no. of flagellar segments                | ca. 62 % BL, ca. 55 segments                                                                                              | n.d.                                                                                                                            | <b>75–99% BL</b> , ≤ 70 segments                                                                                             |
| Prp IV     | shape of carpus & propodus in mature males       | <b>only slightly curved</b>                                                                                               | <b>clearly curved</b> , facilitates grasping the female during mating                                                           | <b>clearly curved</b> , facilitates grasping the female during mating                                                        |
|            | propodus superior margin and submarginal surface | 6–13 simple spiniform setae                                                                                               | n.d.                                                                                                                            | 6–12 simple spiniform setae                                                                                                  |
| Prp VII    | propodus superior margin and submarginal surface | 9–18 simple spiniform setae                                                                                               | n.d.                                                                                                                            | 10–17 simple spiniform setae                                                                                                 |
|            | propodus, longest robust seta on inferior margin | 9–15% of propodus length                                                                                                  | n.d.                                                                                                                            | 8–13% of propodus length                                                                                                     |
| Plp I      | protopodite                                      | <0.96 times as wide as long, around 4 hooks on medial margin                                                              | ca. 0.85 times as long as wide (cf. Henry and Magniez 1996, Fig. 2), around 4 hooks on medial margin                            | <b>1.2–1.6</b> times as wide as long, 4–6 hooks on medial margin                                                             |
|            | exopodite                                        | 1.05–1.12 times as long as wide, lacks concavity on lateral margin, without setation                                      | lacks concavity on lateral margin, 26 simple setae along lateral and distal margins and 9 plumose terminal marginal setae       | <b>&gt;1.4</b> times as long as wide, without or with extremely shallow concavity (with 0–5, <b>mainly 1–4</b> simple setae) |
| Plp II     | protopodite                                      | longer than broad                                                                                                         | longer than broad                                                                                                               | longer or equally long than broad                                                                                            |
|            | exopodite                                        | biarticulate, distal article ovoid, 2 setae on basal article and 5–9 simple setae and 3–5 plumose setae on distal article | biarticulate, distal article ovoid, 2 setae on basal article and 9 simple setae and 4 plumose setae on distal article           | biarticulate, with <b>16–22 simple</b> setae and <b>≥7 plumose</b> setae                                                     |
|            | endopodite                                       | ovoid shaped, spoon-shaped <i>Capitulum</i> with smooth surface and small <i>cannula</i>                                  | ovoid shaped, spoon-shaped <i>Capitulum</i> with smooth surface, small <i>cannula</i>                                           | elongated ovoid, <i>capitulum</i> <b>helical</b> , <i>cannula</i> short                                                      |
| Plp IV, V  | setation along margins                           | <b>absent</b>                                                                                                             | <b>few setae</b> along proximal margin                                                                                          | <b>few</b> (pleopod V: 3–5) simple setae on lateral margin proximally                                                        |
|            | respiratory area                                 | small, about ¼ of exopodite surface (pleopod V: 21–28% of exopodite area)                                                 | small, about ¼ of exopodite surface                                                                                             | pleopod V: <b>55–68%</b> of exopodite surface                                                                                |
| U          | endopodite                                       | 8–9 simple spiniform setae                                                                                                | n.d.                                                                                                                            | <b>15–25</b> simple spiniform setae                                                                                          |
|            |                                                  | <i>Asellus aquaticus aquaticus</i> Linnaeus, 1758                                                                         | <i>Asellus aquaticus infernus</i> Turk-Prevorčnik & Blejec, 1998                                                                | <i>Asellus aquaticus cavernicolus</i> Racovitza, 1925                                                                        |
|            | References                                       | Verovnik et al., 2009                                                                                                     | Turk-Prevorčnik & Blejec, 1998                                                                                                  | Racovitza, 1925                                                                                                              |
|            | Habitat                                          | <b>epigean</b> (with possible subterranean populations)                                                                   | hypogean                                                                                                                        | hypogean                                                                                                                     |
| Body, eyes | pigmentation                                     | <b>present</b> , eyes black with 3 ommatidia each                                                                         | absent                                                                                                                          | absent                                                                                                                       |
| A II       | length, no. of flagellar segments                | <b>85–106% BL</b> , 50–82 segments                                                                                        | <b>66–98% BL</b> , ≤ 90 segments                                                                                                | <b>length &gt; BL</b> , <b>&gt;75 (mainly 90) segments</b>                                                                   |
| Prp IV     | shape of carpus & propodus in mature males       | <b>clearly curved</b> , facilitates grasping the female during mating                                                     | <b>clearly curved</b> , facilitates grasping the female during mating                                                           | <b>clearly curved</b> , facilitates grasping the female during mating                                                        |
|            | propodus superior margin and submarginal surface | <b>3–6</b> simple spiniform setae                                                                                         | n.d.                                                                                                                            | <b>13–34</b> simple spiniform setae                                                                                          |
| Prp VII    | propodus superior margin and submarginal surface | 8–12 simple spiniform setae                                                                                               | n.d.                                                                                                                            | <b>21–56</b> simple spiniform setae                                                                                          |
|            | propodus, longest robust seta on inferior margin | <b>18–21%</b> of propodus length                                                                                          | n.d.                                                                                                                            | 12–20% of propodus length                                                                                                    |
| Plp I      | protopodite                                      | 0.9–1.1 times as wide as long, 3–6 hooks on medial margin                                                                 | <b>around 1.3</b> times as wide as long, 3–6 hooks on medial margin                                                             | 0.9–1.2 as wide as long                                                                                                      |

|           |                        |                                                                                                       |                                                                                                               |                                                                                                                             |
|-----------|------------------------|-------------------------------------------------------------------------------------------------------|---------------------------------------------------------------------------------------------------------------|-----------------------------------------------------------------------------------------------------------------------------|
|           | exopodite              | <b>1.66-1.96</b> times as long as wide, with well-expressed concavity (with <b>3-12</b> simple setae) | <b>&gt;1.4</b> times as long as wide, symmetrical and shallow concavity (with <b>around 5</b> simple setae)   | <b>&gt;1.4</b> times as long as wide, symmetrical and well-expressed concavity (with more than 5, <b>mainly 7-15</b> setae) |
| Plp II    | protopodite            | longer than broad                                                                                     | little longer than broad                                                                                      | n.d.                                                                                                                        |
|           | exopodite              | biarticulate, with <b>9-14 simple</b> and <b>5-8 plumose</b> setae                                    | biarticulate, with <b>9-12 simple</b> setae and 3-5 plumose setae                                             | biarticulate, with 8-14 simple setae and <b>≥7 plumose</b> setae                                                            |
|           | endopodite             | elongated ovoid, <i>capitulum helical</i> , <i>cannula</i> short                                      | elongated ovoid, <i>capitulum helical</i> , <i>cannula</i> short                                              | n.d.                                                                                                                        |
| Plp IV, V | setation along margins | <b>some</b> (pleopod IV: 7-11, pleopod V: 5-10) simple setae on lateral margin proximally             | <b>few</b> (pleopod V) simple setae on lateral margin proximally (cf. Turk-Prevorčnik & Blejec 1998, Fig. 1f) | n.d.                                                                                                                        |
|           | respiratory area       | pleopod V: small, <b>30-39%</b> of exopodite surface                                                  | pleopod V: 15-26% of exopodite surface                                                                        | pleopod V: <b>≥55%</b> of exopodite surface                                                                                 |
| U         | endopodite             | <b>10-15</b> simple spiniform setae                                                                   | n.d.                                                                                                          | <b>28-66</b> simple spiniform setae                                                                                         |

---
